# Supplementary material
Source: PubMed Central journal article supplement (PMC2872270)
Supplement: mmc1.pdf [file mmc1.pdf]

## Supporting Material

### Fold Specificity Calculations

Based on the full atomistic force field AMBER [1], we performed simulated annealing calculations for an ensemble of several hundred conformers generated for each of the 1000 sequences using CYANA 2.1 [2, 3]. The conformers are within the upper and lower bounds on the C $\alpha$ -C $\alpha$  distances and dihedral angles we input into the program. This ensures our de novo design strategy observes true backbone flexibility [4]. The TINKER package [5] is subsequently used for local energy minimization of the conformers. The fold specificities of the sequences are finally calculated using the following formula:

$$f_{\text{specificity}} = \frac{\sum_{i \in \text{new sequence conformers}} \exp[-\beta E_i]}{\sum_{i \in \text{native sequence conformers}} \exp[-\beta E_i]}$$

where  $\beta = 1/k_B T$ . A workflow of stage two detailing the programs used and the number of structures that are input and output in each step is given in Fig. S2.

### Details on Ensemble Generation for Approximate Binding Affinity Calculation

*Structure Prediction:* For each sequence from stage one, 3-dimensional structures are generated using RosettaAbinitio [6-8] part of the Rosetta++ software package. RosettaAbinitio is based upon experimental observation that the local structure of the protein is influenced, but not uniquely determined by the local sequence of the protein. The final overall protein structure is obtained when the modification of local structures come together to give a compact structure, accounting for non-local interactions such as buried hydrophobic residues, paired  $\beta$  strands, and specific side chain interactions. For each sequence, 1000 possible structures are generated using Monte Carlo. These structures represent local minima in free energy, not necessary the global minimum.

*Clustering:* The 1000 decoys from the structure prediction step are clustered based upon their  $\phi$  and  $\psi$  angles using OREO [9, 10]. This groups together decoys that have similar backbone structures. The medoid, or median structure, from each of the ten largest clusters is selected to dock to the target protein. In addition, the overall lowest-energy structure is selected. This gives 11 possible backbone structures for each sequence, incorporating backbone flexibility into the ensemble generation.

When the peptides are clustered, there are typically 15 – 30 clusters formed. Within each cluster, the C $\alpha$  RMSD difference among structures is on the order of 0.5 – 2 Å, so the medoid is very representative of the cluster. The C $\alpha$  RMSD between medoids is on the order of 3 – 5 Å. These RMSD ranges among the members of the clusters and between clusters are similar for all sequences, whether that sequence ends up being ranked #1 or #17.

*Docking Prediction:* Since the binding site of the target protein is known, a refined docking prediction is done using RosettaDock [11-13]. For each sequence, each of the 11 peptide backbone structures is docked against the target protein, near the binding site. For each of the 11 docking runs per sequence, 1000 decoys are generated using Monte Carlo. The peptide is first aligned to variant E1 in the complex structure (to place it near the binding site) and is allowed to translate 3 Å normal to the binding site, 8 Å parallel to the binding site, and rotate 8°. The ten lowest energy decoys in each of the 11 runs are used as starting structures in the final rotamerically-based conformation ensemble generation (110 starting structures per sequence).

Flexibility is introduced into the ensemble by selecting a number of the lowest-energy docking conformers for each peptide structure docked to the target protein. The ten lowest-energy docking conformers that are selected for each peptide for the final ensemble generation stage differ from one another (C $\alpha$  RMSD) by 0.5 – 3 Å. This spread occurs regardless of peptide structure used to dock or sequence. By selecting the lowest-energy docking conformers, this ensures that the conformers that will make the largest contribution to partition function (i.e. lowest energies) are included.

*Final Ensemble Generation:* The rotamerically-based conformation ensembles are generated using RosettaDesign [14]. This is done by taking a starting structure and adjusting only the rotamers on the side-chains while leaving the backbone sequence intact.

For each backbone/docked structure, a residue is randomly chosen and the rotamer changed. If this change lowers the energy, the move is accepted, if it raises the energy, the move is accepted based upon the Metropolis Criteria. These steps are repeated until thousands of rotamer substitutions are attempted. The final conformation is a low-energy rotamer conformation that will have a significant contribution to  $q$ . 200 low-energy rotamer conformations are generated per backbone/docked structure. The full-atom RMSD differences among the rotamer conformations are slighter, being on the order of 0.5 – 1 Å. These RMSD spreads (between peptide structures, docked conformers, and rotamer conformations) are consistent among all sequences, so we do not find that one ensemble repeatedly counts a similar configuration while another does not.

### **Predictions with Different Docking Methods**

We also compared the effect of a different docking program on the K\* ranking. For four sequences (3 variants plus the native sequence), the framework was run again, this time using HADDOCK (High Ambiguity Driven biomolecular DOCKing) [15, 16] as the docking step instead of RosettaDock.

HADDOCK differs from RosettaDock and most other docking programs in that it

uses experimental data, when available, to drive the docking. The experimental data can consist of chemical shift perturbation data, mutagenesis data, or bioinformatic predictions. The data is used to define the residues that are involved in the protein-protein interaction. For the case of compstatin bound to complement component C3c, the residues involved in the peptide-protein interaction were elucidated from the paper by Janssen et al. [17].

After the docking was finished using HADDOCK, the ten lowest-scoring complexes from the lowest HADDOCK score cluster from each of the eleven docking runs were used as starting structures (110 total starting structures per sequence) for the final ensemble generation (using RosettaDesign). Table S3 shows the ranking results using both RosettaDock and HADDOCK. The

K\* ranking appears to be independent of the docking program used. The sequences obtained the same rank-order whether RosettaDock or HADDOCK was used for the docking step.

Table S1: Approximate binding affinity ranking of previous compstatin variants with experimental relative activities

| # | peptide                           | sequence                          | approx. binding affinity rank | relative activity | ref. |
|---|-----------------------------------|-----------------------------------|-------------------------------|-------------------|------|
| 8 | Ac-V4Y/H9A                        | Ac-ICVYQDWGAHRCT-NH <sub>2</sub>  | 1                             | 16                | [18] |
| 9 | Ac-V4W/H9A<br>(variant E1)        | Ac-ICVWQDWGAHRCT-NH <sub>2</sub>  | 2                             | 45                | [19] |
| 6 | Ac-I1L/H9W/T13G                   | Ac-LCVVQDWGWHRRCG-NH <sub>2</sub> | 3                             | 4                 | [20] |
| 3 | Ac-R11S                           | Ac-ICVVQDWGHHHSCT-NH <sub>2</sub> | 4                             | 0.5               | [21] |
| 1 | Compstatin ring                   | CVYQDWGAHRC -NH <sub>2</sub>      | 5                             | 0.4               | [22] |
| 7 | Ac-V4Y/H9F/T13V                   | Ac-ICVYQDWGFHRRCV-NH <sub>2</sub> | 6                             | 11                | [18] |
| 5 | Compstatin<br>(native)            | ICVVQDWGHRRCV-NH <sub>2</sub>     | 7                             | 1                 | [23] |
| 2 | Ac-I1S/V4F/H9R/<br>H10L/R11A/T13P | Ac-SCVFQDWGRLACP-NH <sub>2</sub>  | 8                             | 0.5               | [20] |
| 4 | R11K                              | ICVVQDWGHHKCT-NH <sub>2</sub>     | 9                             | 0.6               | [21] |

Table S2: Stage one results for the de novo design of compstatin variants

| position | native residue | preferred mutations for run 1 | preferred mutations for run 2 |
|----------|----------------|-------------------------------|-------------------------------|
| 1        | I              | I,L,W,V,F                     | N,D,Q,I,F,W                   |
| 2        | C              | -                             | -                             |
| 3        | V              | -                             | -                             |
| 4        | V              | W                             | W                             |
| 5        | Q              | -                             | -                             |
| 6        | D              | -                             | -                             |
| 7        | W              | -                             | -                             |
| 8        | G              | -                             | -                             |
| 9        | H              | Q,K,H                         | N,K,T                         |
| 10       | H              | N,F,M,Y                       | N,K,T                         |
| 11       | R              | N,K                           | Q,K                           |
| 12       | C              | -                             | -                             |
| 13       | T              | W                             | W                             |

Table S3: Comparison of ranking metric based upon docking program used: RosettaDock versus HADDOCK

| sequence | approx. binding affinity rank using RosettaDock | approx. binding affinity rank using HADDOCK |
|----------|-------------------------------------------------|---------------------------------------------|
| SQ027    | 1                                               | 1                                           |
| SQ086    | 2                                               | 2                                           |
| SQ059    | 3                                               | 3                                           |
| native   | 4                                               | 4                                           |

Table S4: Amino acid sequences of peptides synthesized for Biacore experiments. Brackets denote cyclization. Bold characters denote sequence differences from the native compstatin.

| peptide name              | amino acid sequence                                                                                        |
|---------------------------|------------------------------------------------------------------------------------------------------------|
| linear (negative control) | I <b>AVVQDWGHHRA</b> T-(PEG) <sub>8</sub> -K-(biotin)-NH <sub>2</sub>                                      |
| native                    | I [CVVQDWGHHRC] T-(PEG) <sub>8</sub> -K-(biotin)-NH <sub>2</sub>                                           |
| variant E1                | I [CV <b>W</b> QDWG <b>A</b> HRC] T-(PEG) <sub>8</sub> -K-(biotin)-NH <sub>2</sub>                         |
| SQ027                     | <b>W</b> [CV <b>W</b> QDWG <b>TN</b> RC] <b>W</b> -(PEG) <sub>8</sub> -K-(biotin)-NH <sub>2</sub>          |
| SQ059                     | <b>D</b> [CV <b>W</b> QDWG <b>TN</b> KC] <b>W</b> -(PEG) <sub>8</sub> -K-(biotin)-NH <sub>2</sub>          |
| SQ086                     | <b>Q</b> [CV <b>W</b> QDWG <b>Q</b> N <b>Q</b> C] <b>W</b> -(PEG) <sub>8</sub> -K-(biotin)-NH <sub>2</sub> |

Table S5: Inter-molecular contacts for the best binders of the selected 10 variants (Table 2) and comparison with E1 variant (PDB code 2QKI; [17]). Listed are C3c amino acids within 5 Å from the following atoms of compstatin variants:

Position 1, Ile(C<sup>δ1</sup>), Asn(C<sup>γ</sup>), Ser(O<sup>γ</sup>), Pro(C<sup>γ</sup>), Asp(C<sup>γ</sup>), Gln(C<sup>δ</sup>), Gly(C<sup>α</sup>), Lys(N<sup>ε</sup>)

Position 2, Cys(S<sup>γ</sup>)

Position 3, Val(C<sup>β</sup>)

Position 4, Trp(N<sup>ε1</sup>, C<sup>ε2</sup>, C<sup>ε3</sup>)

Position 5, Gln(C<sup>δ</sup>)

Position 6, Asp(C<sup>γ</sup>)

Position 7, Trp(N<sup>ε1</sup>, C<sup>ε2</sup>, C<sup>ε3</sup>)

Position 8, Gly(C<sup>α</sup>)

Position 9, Ala(C<sup>β</sup>), His(N<sup>ε1</sup>), Glu(C<sup>δ</sup>), Asn(C<sup>γ</sup>), Thr(C<sup>β</sup>), Gln(C<sup>δ</sup>), Lys(N<sup>ε</sup>)

Position 10, His(C<sup>ε1</sup>), Asn(C<sup>γ</sup>), Lys(N<sup>ε</sup>)

Position 11, Arg(C<sup>ε</sup>), Lys(N<sup>ε</sup>), Gln(C<sup>δ</sup>)

Position 12, Cys(S<sup>γ</sup>)

Position 13, Thr(C<sup>β</sup>), Trp(N<sup>ε1</sup>, C<sup>ε2</sup>, C<sup>ε3</sup>)

| variant | side chain contacts within 5 Å                                                                                                                                                                                                                                                   |
|---------|----------------------------------------------------------------------------------------------------------------------------------------------------------------------------------------------------------------------------------------------------------------------------------|
| SQ087   | Asn1-Asp348/Lys385/Ser387/Ser436/Val437/Leu438/Arg439<br>Cys2-Ser387<br>Val3-Pro346/His434/Ser436/Asn451/Leu453/Leu491<br>Trp4-Ser436/Val437/Leu438/Leu448/Asn449/Val450/Asn451<br>Asp6-Asn451/Leu491<br>Lys9-Pro346/Asn389<br>Cys12-Ser387<br>Trp13-Val374/Ser387/Ile388/Asn389 |
| SQ072   | Asp1-Ser376/Leu377/Arg439<br>Cys2-Arg439<br>Val3-Leu438/Arg439/Thr440<br>Trp4-Asp348/Lys385/Ser436/Val437/Leu438/Asn451<br>Gln5-Asp348/Lys385/Ser387<br>Asp6-Val374/Gln375/Ser376/Lys385/Leu386/Ser387<br>Trp7-Ser387/Asn389<br>Gln9-Val374                                      |

Continued on Next Page ...

Table S5 – Continued

| variant | side chain contacts within 5 Å                                                                                                                                                                                                                                          |
|---------|-------------------------------------------------------------------------------------------------------------------------------------------------------------------------------------------------------------------------------------------------------------------------|
| SQ077   | Val3-Arg458<br>Gln5-Arg458/Glu461/Arg485/Gly488/Asp490<br>Asp6-Arg458/Ala459<br>Trp7-Glu486/Pro487/Gly488<br>Gly9-Gly488<br>Gln11-Leu454/Arg455/Met456/Asp490<br>Trp13-Gly344/Met345/Pro346/Leu453/Leu454/<br>Arg455/Met456/Asp490                                      |
| SQ040   | Trp4-His391/Pro392/Ser393<br>Gln5-Pro392/Ser393/Gln394/Asn430<br>Trp7-Thr425/Asn428/Ser429/Asn430/Tyr432/Gln394<br>Thr9-Pro392/Asn430/Asp457<br>Asn10-Arg455/Met456/Asp457/Arg458<br>Gln11-Gly344/Arg455/Pro392<br>Cys12-Pro392<br>Trp13-Arg458                         |
| SQ098   | Val3-Gly370<br>Trp4-Lys395<br>Gln5-Gly370/Glu371<br>Asp6-Ser398/Ile399<br>Trp7-Val368/Gln369/Gly370/Glu371/Ile388/Asn389/<br>Leu397/Ser398/Ile399/Thr400<br>Gly8-His391<br>Asn9-Glu371/Asn389/Thr390<br>Lys11-Glu371/Asn389<br>Trp13-Gly370/Glu371/Asp372/Thr373/Val374 |
| SQ086   | Gln1-Asp490/Leu491<br>Trp4-Met345/Pro346/Leu453/Leu491/Gly344/Asn389/Thr390<br>Gln5-Asp490<br>Asp6-Arg455<br>Trp7-Leu454/Arg455/Met456/Asp457/Arg458/Glu461/<br>Arg485/Gly488/Gln489/Asp490<br>Gln11-Arg458/Gly488<br>Cys12-Asp490                                      |

Continued on Next Page ...

Table S5 – Continued

| variant | side chain contacts within 5 Å                                                                                                                                                                                                                                                                 |
|---------|------------------------------------------------------------------------------------------------------------------------------------------------------------------------------------------------------------------------------------------------------------------------------------------------|
| SQ024   | Ser1-Pro346/Lys385/Ser387/Leu453<br>Cys2-Asn389<br>Val3-Gly344/Met345/Pro346/Leu453/Arg455<br>Trp4-Gly344/Asn389/Thr390/His391/Pro392<br>Gln5-Arg455/Asp490<br>Asp6-Asn430/Arg455/Met456/Asp457<br>Trp7-Arg458<br>Asn9-Arg458<br>Gln11-Asp490<br>Trp13-Asn451/Leu491/Val493                    |
| SQ059   | Val3-Gly344/Thr390/His391/Pro392<br>Trp4-Gly344/Met345/Pro346/Leu453/Asp490<br>Gln5-Leu454/Asp490<br>Asp6-Arg455/Asp457/Arg458<br>Trp7-Arg458/Glu461/Gly488<br>Cys12-Asp490                                                                                                                    |
| SQ055   | Val3-Gly344/Thr390/His391/Pro392<br>Trp4-Gly344/Met345/Pro346/Leu453/Asp490<br>Gln5-Leu454/Asp490<br>Asp6-Arg455/Asp457/Arg458<br>Trp7-Arg458/Glu461/Gly488<br>Cys12-Asp490                                                                                                                    |
| SQ088   | Gly1-Leu454/Arg455/Met456/Asp490<br>Val3-Met456/Asp457/Arg458/Glu461<br>Trp4-Gly488<br>Gln5-Asp490<br>Asp6-Arg458<br>Asn10-Gly344/Asn389/Thr390/His391/Pro392<br>Gln11-Asn389<br>Trp13-Gly344/Met345/Pro346/Leu453/Leu454/Arg455/Asp490                                                        |
| E1      | Ile1-Asn390<br>Cys2-Asn390<br>Val3-Gly345/Met346/Pro347/Leu455/Arg456<br>Trp4-Gly345/Thr391/His392/Pro393<br>Gln5-Leu455/Arg456/Met457/Asp491<br>Trp7- Leu455/Met457/Asp458/Arg459/Glu462/Arg486/<br>Gly489/Gln490/Asp491<br>Gly8-Gly489/Asp491<br>Ala9-Asp491<br>His10-Leu492<br>Cys12-Gly345 |

Table S6: Inter-molecular hydrogen bonds for the best binders of the selected 10 variants (Table 2) and comparison with E1 variant (PDB code 2QKI; [17]). The hydrogen bond criteria were: distance between donor and acceptor atom < 2.4 Å and angle hydrogen atom-acceptor heavy atom-donor heavy atom < 35°. Hydrogen bonds were calculated using MOLMOL [24].

| approx. binding affinity rank | variant | donor/acceptor   | C3c    | donor/acceptor   | distance (Å) | angle (°) |
|-------------------------------|---------|------------------|--------|------------------|--------------|-----------|
| 3                             | SQ087   |                  |        |                  |              |           |
|                               | Asn1    | H <sup>δ21</sup> | Asp348 | O <sup>δ2</sup>  | 2.4          | 31.7      |
|                               | Trp4    | H <sup>ε1</sup>  | Asn449 | O                | 2.0          | 25.8      |
|                               | Lys9    | H <sup>ε3</sup>  | Asn389 | O <sup>δ1</sup>  | 1.9          | 8         |
| 4                             | SQ072   |                  |        |                  |              |           |
|                               | Asp1    | O <sup>δ1</sup>  | Ser376 | H <sup>γ</sup>   | 2.0          | 13.9      |
|                               | Asp6    | O <sup>δ1</sup>  | Ser387 | H <sup>N</sup>   | 2.0          | 9.3       |
|                               | Val3    | O                | Arg439 | H <sup>N</sup>   | 2.4          | 18.5      |
| 5                             | Trp4    | H <sup>ε1</sup>  | Ser436 | O <sup>γ</sup>   | 2.1          | 17.4      |
|                               | SQ077   |                  |        |                  |              |           |
|                               | Gln5    | H <sup>ε21</sup> | Gly488 | O                | 2.2          | 31.0      |
|                               | Asp6    | O <sup>δ1</sup>  | Arg458 | H <sup>ε</sup>   | 1.9          | 12.7      |
| 6                             | Asp6    | O <sup>δ1</sup>  | Arg458 | H <sup>η21</sup> | 1.8          | 20.5      |
|                               | Gln11   | H <sup>ε22</sup> | Asp490 | O <sup>δ1</sup>  | 2.4          | 24.8      |
|                               | SQ040   |                  |        |                  |              |           |
|                               | Asn10   | H <sup>N</sup>   | Asp457 | O <sup>δ1</sup>  | 1.8          | 18.9      |
| 7                             | Gln11   | O <sup>δ1</sup>  | Arg455 | H <sup>η1</sup>  | 1.9          | 32.3      |
|                               | SQ098   |                  |        |                  |              |           |
|                               | Gln5    | H <sup>ε22</sup> | Glu371 | N                | 2.3          | 10.6      |
| 10                            | Trp13   | H <sup>ε1</sup>  | Asp372 | N                | 2.4          | 21        |
|                               | SQ086   |                  |        |                  |              |           |
|                               | Gln1    | H <sup>ε22</sup> | Asp490 | O <sup>δ1</sup>  | 2.0          | 13.4      |
|                               | Trp4    | O                | Arg455 | H <sup>η11</sup> | 1.9          | 14.8      |
|                               | Gln5    | H <sup>ε21</sup> | Asp490 | O <sup>δ2</sup>  | 2.0          | 26.9      |
|                               | Trp7    | H <sup>ε1</sup>  | Met456 | O                | 1.8          | 31        |
| 13                            | Gln11   | O <sup>ε1</sup>  | Arg458 | H <sup>η12</sup> | 2.1          | 16.5      |
|                               | SQ024   |                  |        |                  |              |           |
|                               | Trp4    | O                | Arg455 | H <sup>ε</sup>   | 2.0          | 22        |
|                               | Trp4    | H <sup>N</sup>   | Gly344 | O                | 1.8          | 6.6       |
| 14                            | Asn9    | H <sup>δ22</sup> | Arg458 | NH <sub>2</sub>  | 2.1          | 13.5      |
|                               | SQ059   |                  |        |                  |              |           |
|                               | Gly8    | O                | Arg458 | H <sup>ε</sup>   | 2.0          | 9.3       |
|                               | Gly8    | O                | Arg458 | H <sup>η21</sup> | 2.0          | 19.9      |

Continued on Next Page ...



Table S6 – Continued

| approx.<br>binding<br>affinity rank | variant | donor/<br>acceptor | C3c    | donor/<br>acceptor | distance<br>(Å) | angle<br>(°) |
|-------------------------------------|---------|--------------------|--------|--------------------|-----------------|--------------|
| 15                                  | SQ055   |                    |        |                    |                 |              |
|                                     | Val3    | O                  | Arg455 | H <sup>η11</sup>   | 2.1             | 33.7         |
|                                     | Asp6    | O <sup>δ1</sup>    | Arg455 | H <sup>η12</sup>   | 2.1             | 3.3          |
|                                     | Asp6    | O <sup>δ2</sup>    | Arg455 | H <sup>η22</sup>   | 2.1             | 5.5          |
| 17                                  | SQ088   |                    |        |                    |                 |              |
|                                     | Val3    | O                  | Arg458 | H <sup>ε</sup>     | 2.0             | 11.6         |
|                                     | Val3    | O                  | Arg458 | H <sup>η21</sup>   | 1.9             | 19.1         |
|                                     | Gln11   | H <sup>ε22</sup>   | Asn389 | O <sup>δ1</sup>    | 1.9             | 4            |
|                                     | Trp13   | H <sup>ε1</sup>    | Leu454 | O                  | 1.8             | 15.5         |
| 11                                  | E1      |                    |        |                    |                 |              |
|                                     | Ile1    | H <sup>N</sup>     | Asn390 | O <sup>δ1</sup>    | 2.1             | 29.6         |
|                                     | Trp4    | H <sup>N</sup>     | Gly345 | O                  | 2.1             | 4.2          |
|                                     | Gln5    | N <sup>ε2</sup>    | Asp491 | H <sup>δ2</sup>    | 2.0             | 29.9         |
|                                     | Trp7    | H <sup>ε1</sup>    | Met457 | O                  | 1.6             | 2.7          |
|                                     | His10   | H <sup>N</sup>     | Asp491 | O <sup>δ1</sup>    | 1.9             | 20.8         |

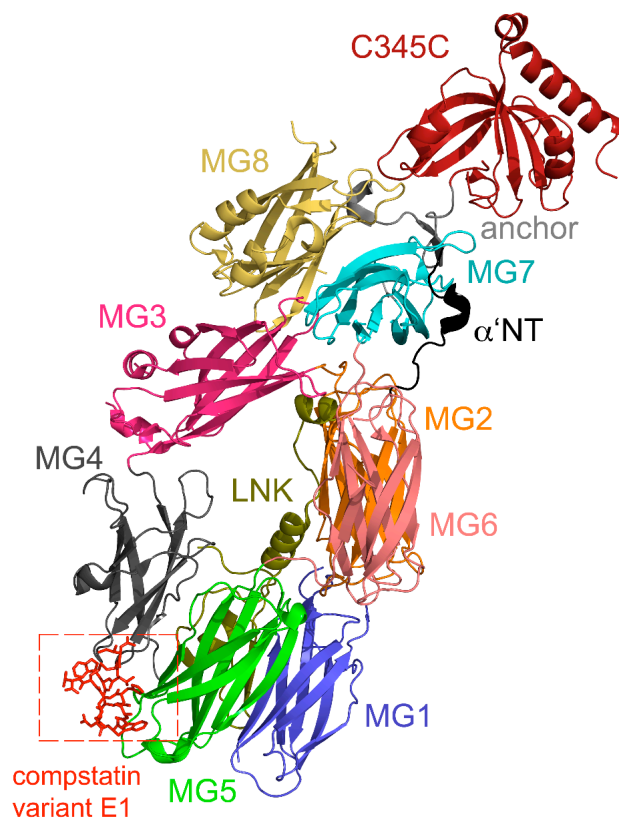

Figure S1: Ribbon representation of the crystal structure of C3c-compstatin complex as elucidated by Janssen et al. [17] at a resolution of 2.4 Å (chains A, B, C, and G in PDB file 2QKI).

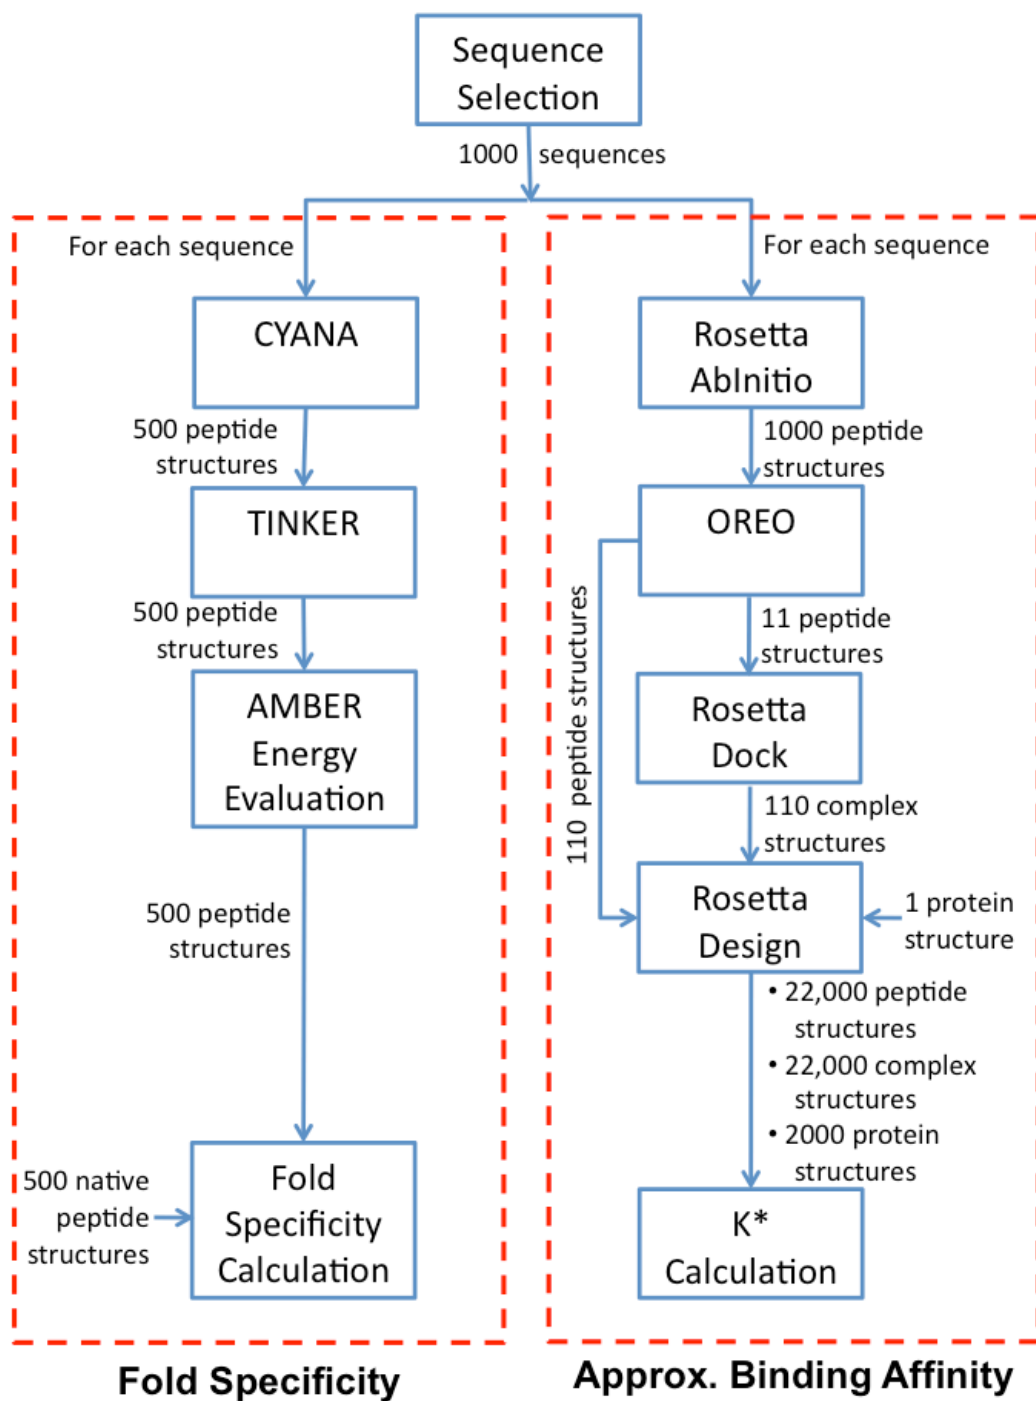

Figure S2: Workflow of two de novo design frameworks: fold specificity and approximate binding affinity

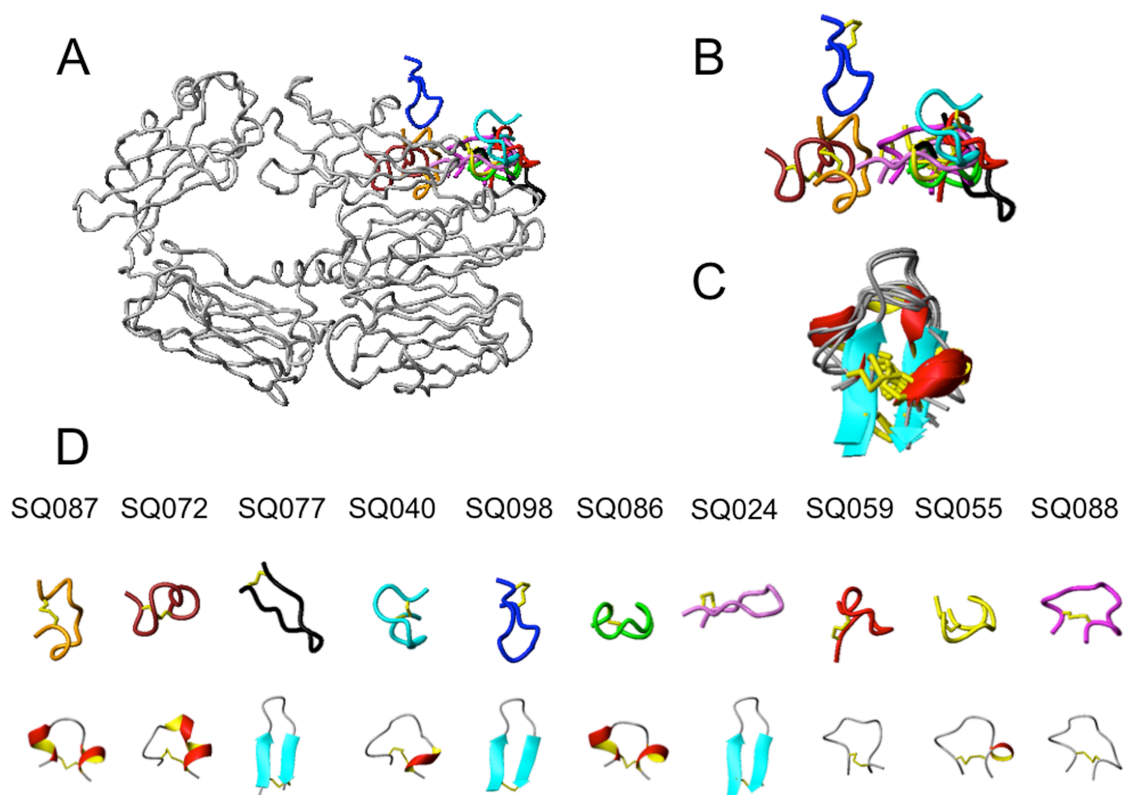

Figure S3: Structural analysis of selected 10 C3c-compstatin variant complexes of Table 2. (A) Superposition of the best binders of the selected 10 C3c-compstatin variant complexes. The backbone C-atoms of C3c have been used for the superposition. Only the  $\beta$ -chain of C3c is shown, to which compstatin binds, whereas the remaining portion of C3c has been deleted for clarity. The 10 C3c structures are identical and appear as one structure (colored in gray), whereas the compstatin variant structures are colored differently (see Panel (D) for color code). (B) Relative topology of the structures of the best binders of the selected 10 compstatin variants. The structure of C3c is deleted for clarity. The color code is explained in the middle row of Panel (D). The disulfide bridge is shown in yellow. (C) Superposition of the structures of the best binders of the selected 10 compstatin variants using the backbone C-atoms. The secondary structures and the disulfide bridge are shown in ribbon and stick representations, respectively. (D) The best binders of the selected 10 compstatin variant structures arranged according to their approximate binding affinities in decreasing order from left (highest) to right (lowest). The sequence id number from Table 2 is marked in the upper row. The middle row depicts the color code of Panels (A) and (B). The bottom row shows the secondary structure of each compstatin variant. Molecular graphics were prepared using the program MOLMOL [24].

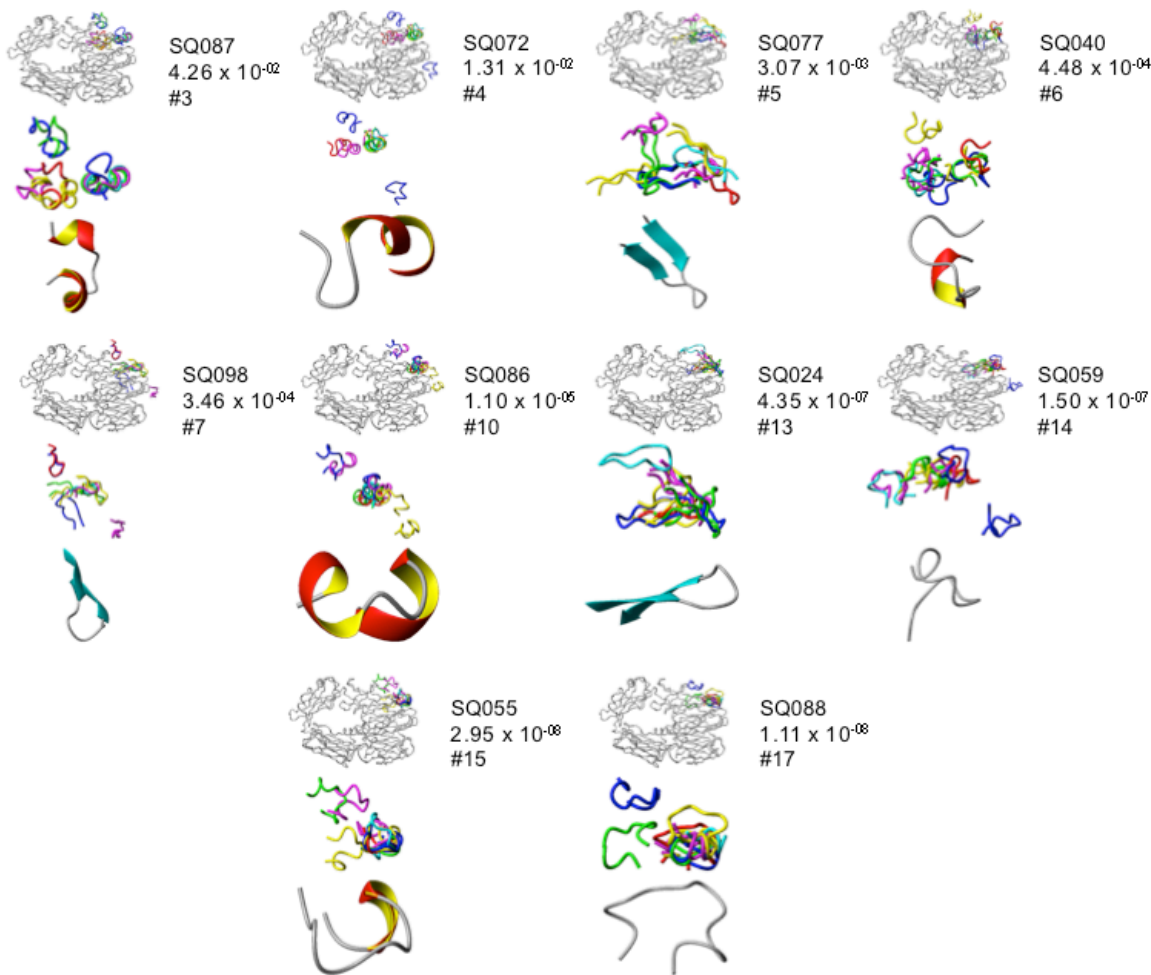

Figure S4: The molecular graphics show the 10 best binders of selected 10 compstatin variants in order of decreasing approximate binding affinity: SQ087, SQ072, SQ077, SQ040, SQ098, SQ086, SQ024, SQ059, SQ055, SQ088 (Table 2). Each figure contains fits of all 10 C3c-compstatin variant structures within each SQ# run. The top panels are C3c-compstatin variant complexes. Out of 3 C3c chains, we show only the  $\beta$ -chain to which the compstatin variant binds. The 10 structures are fitted using the  $C\alpha$ -atoms of C3c only. There are 10 identical overlapping C3c structures in each panel. The color code for compstatin variant follows the RGBYMC order, with red being the lowest energy structure and cyan being the highest energy structure from the group of 10 best binders, as follows: red = structure 1, green = structures 2-3, blue = structures 4-5, yellow = structures 6-7, magenta = structures 8-9, cyan = structure 10. The middle panels depict the compstatin variant alone in the exact same orientation as in the top panels. The color code is the same as in the top panels. The bottom panels contain the structures of the middle panels fitted to the first (lowest energy) structure using the backbone  $C\alpha$ -atoms. There are actually 10 identical overlapping structures. The secondary structure is shown in ribbon representation. There is some variation within a consensus binding site and significant structural and orientational variation. There are 3  $\beta$ -hairpin, 2 random coil, and 5 structures with helical segments of compstatin variants.

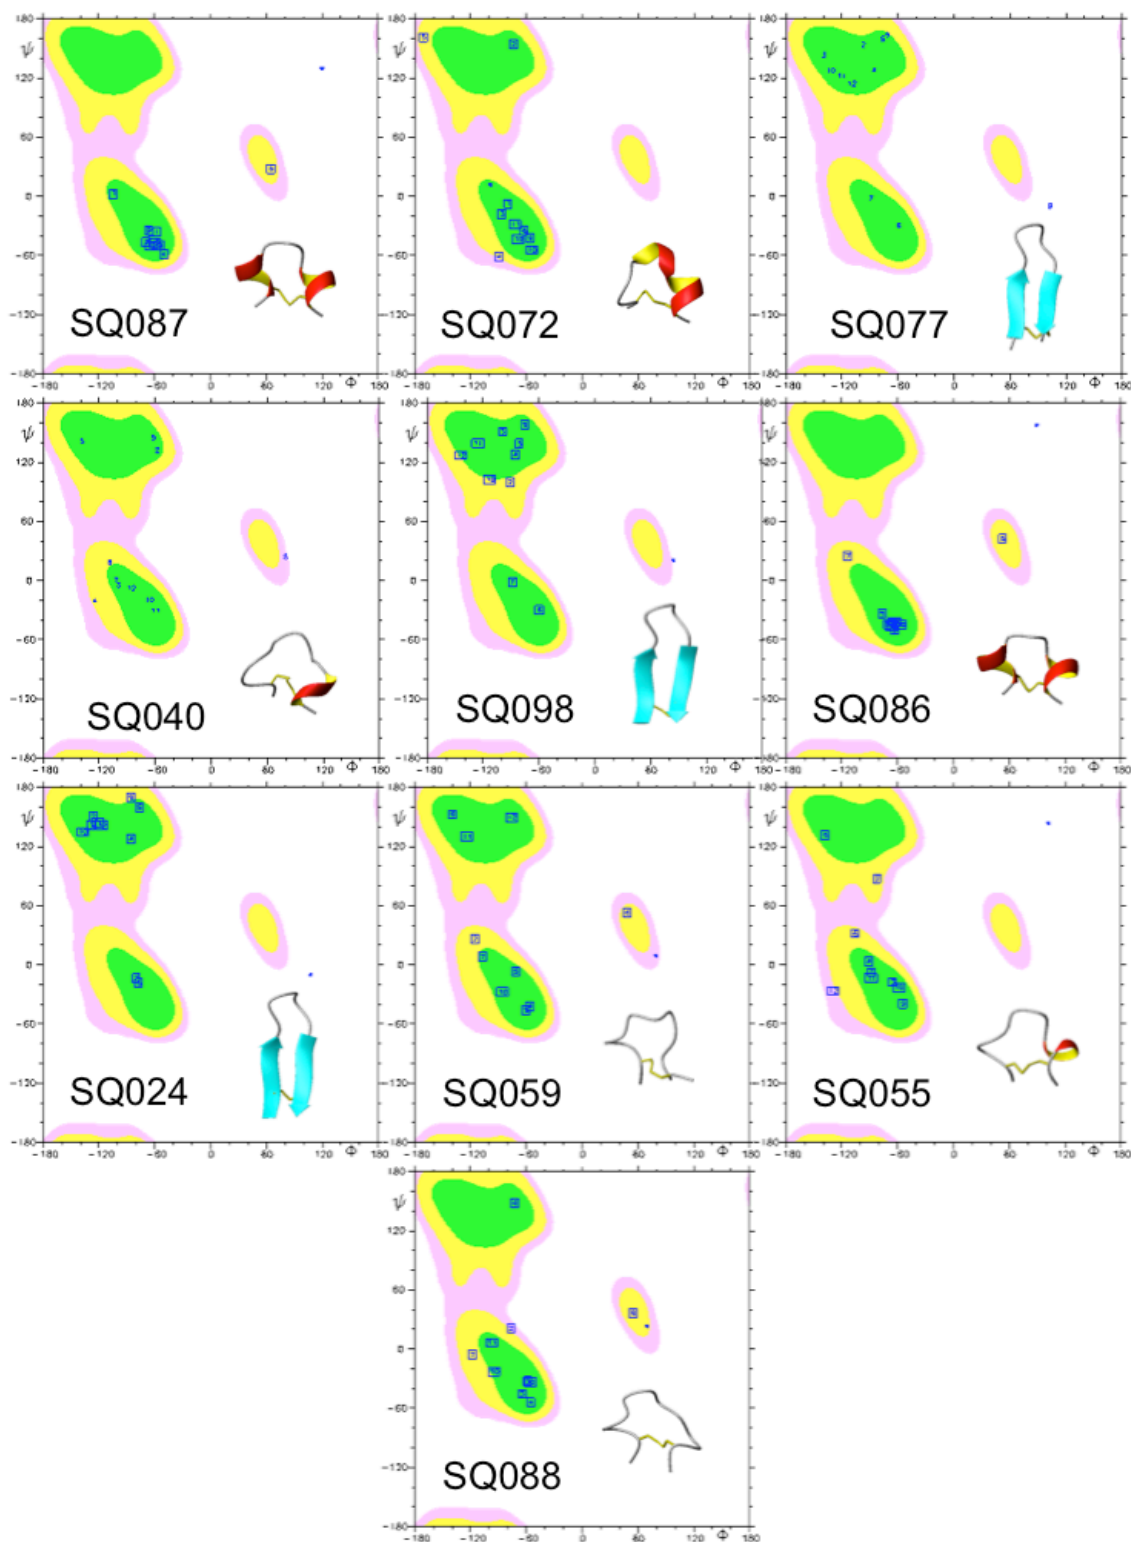

Figure S5: Ramachandran plot analysis of secondary structures for the selected 10 compstatin variants (Table 2). The backbone ( $\phi$ ,  $\psi$ )-torsion angle pairs are marked using the amino acid number. Ribbon diagrams of the structure of the peptides are also shown in the panels. The variants are arranged in decreasing order of their approximate binding affinities. The panels were prepared using the program MOLMOL [24]

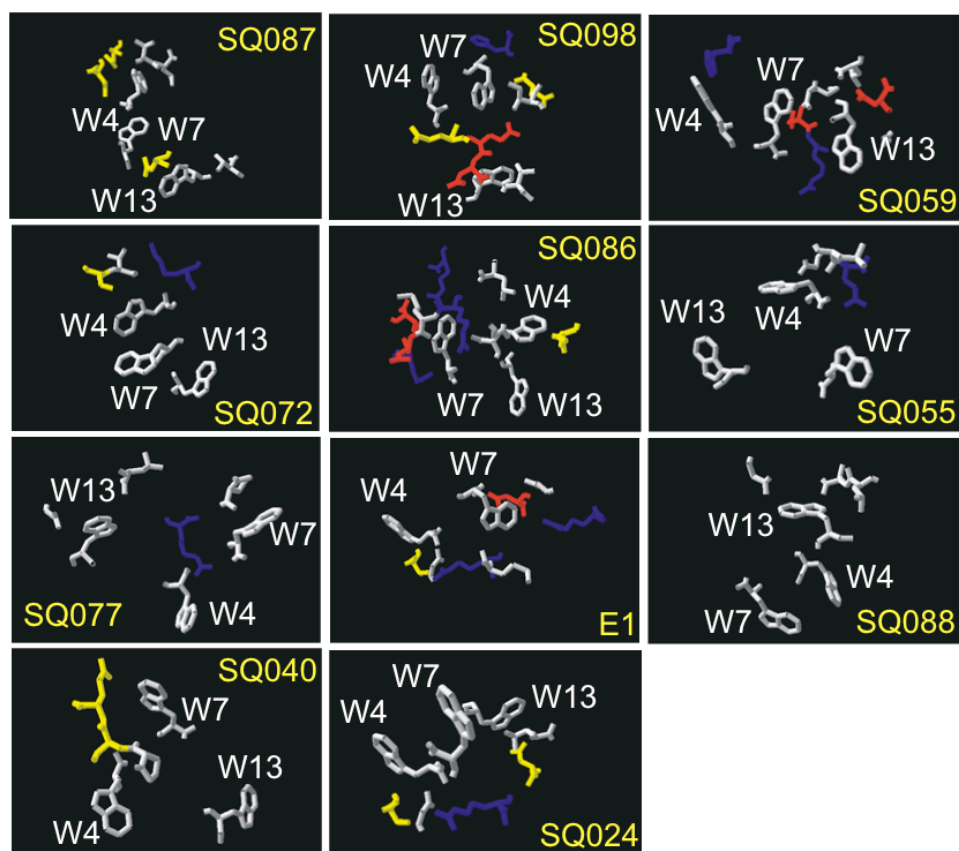

Figure S6: Side chain interactions between each of the three Tryptophans of the best binders of the selected 10 compstatin variants (Table 2) and C3c amino acids. The panels depict amino acids in the C3c binding site within 3.5 Å from Trp4, Trp7, and Trp13, using any backbone or side chain atoms. The color code for the stick representations is: gray for non-polar amino acids, red for acidic, blue for basic, yellow for neutral polar. The E1 variant (crystal structure; [17]) is also included for comparison. Molecular graphics were prepared using the program SPDBV [25].

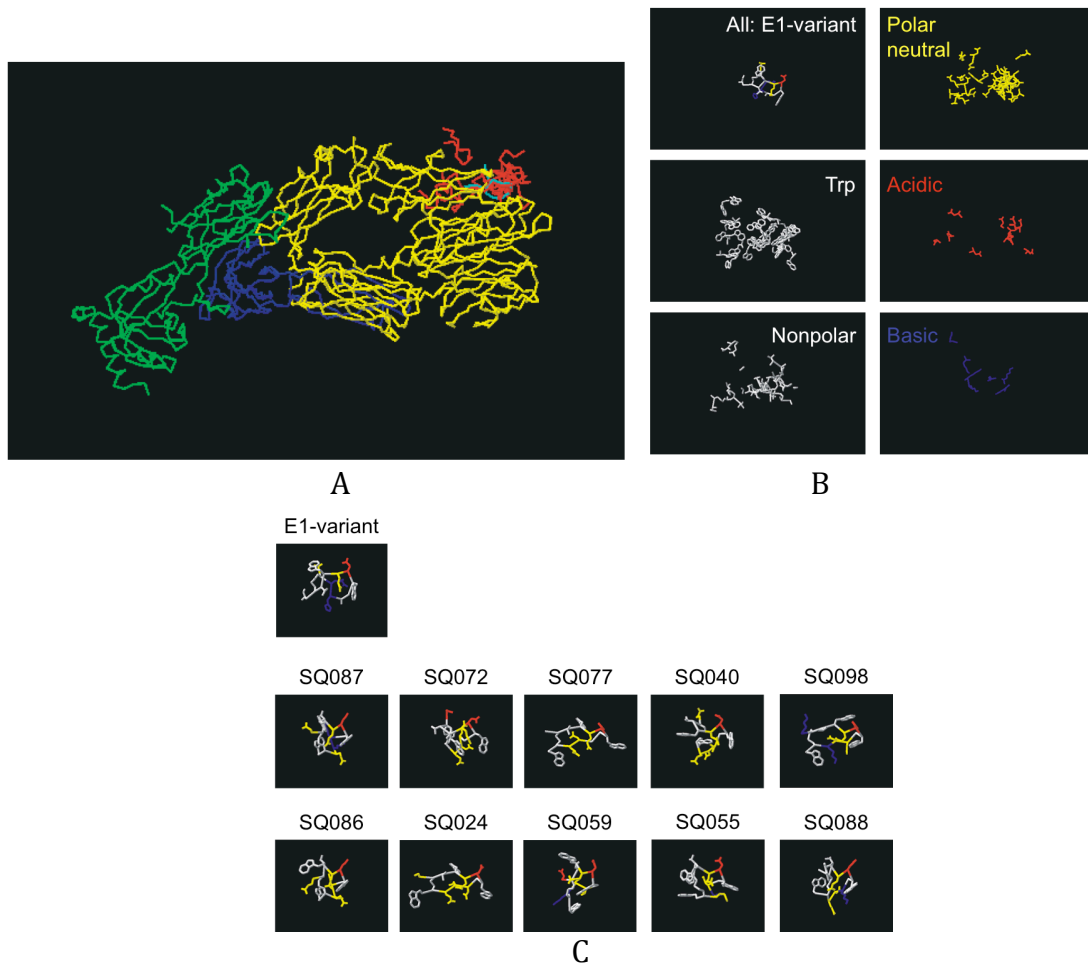

Figure S7: (A) Complexes of C3c (in yellow, green, and blue) and the best binders of the selected 10 compstatin variants (in red; from Table 2) and the E1 variant (in cyan; from crystal structure with PDB code 2QKI; [17]). The structures are superimposed using the  $C\alpha$ -atoms of C3c only and drawn using  $C\alpha$ -traces. Molecular graphics are made with SPDBV [25] (B) Side chains of E1-variant and the best binders of the selected 10 compstatin variants from Table 2. Side chain topologies and orientations as in (A). (C) Intra-molecular side chain interactions for E1 variant (PDB code 2QKI; [17]) and best binders of the selected 10 compstatin variants of Table 2 (arranged in decreasing approximate binding affinities). The structures are fitted using the backbone  $C\alpha$ -atoms and they are shown in the same orientation. Backbones are shown as  $C\alpha$ -traces. Color code as in (A).



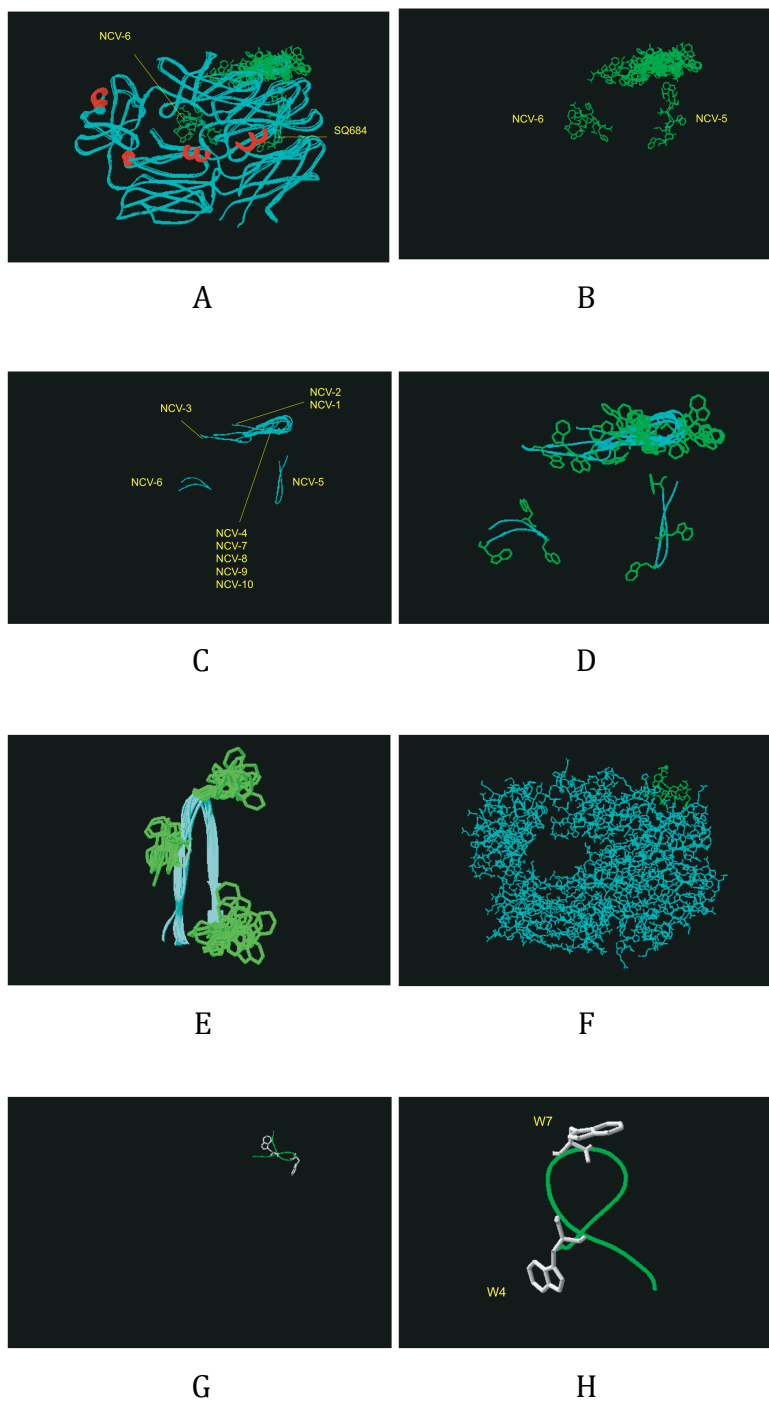

Figure S8: (A-D) Superposition of 10 structures (NCV-1 to NCV-10), using the backbone  $\text{C}\alpha$ - atoms of the complexes. Compstatin is colored in green. Molecular graphics were prepared using SPDBV [25] (A) - (D) show structures on the same orientations and topologies. (E) The best binders of compstatin variants NCV-1 to -10 (Table 2) superimposed using the backbone  $\text{C}\alpha$ -atoms. The three Tryptophans are shown (from left to right W4, W7, and W13). (F) The E1 variant (green) in complex with the  $\beta$ -chain of C3c (cyan). PDB code 2QKI; [17] (G) The E1 variant (green) in the same orientation and topology as in (F), with the two Tryptophans (W4 and W7) shown. (H) The E1 variant with the two Tryptophans (W4 and W7) shown.

## References

- [1] Cornell, W. D., P. Cieplak, C. I. Bayly, I. R. Gould, K. M. Merz, D. M. Ferguson, D. C. Spellmeyer, T. Fox, J. W. Caldwell, and P. A. Kollman, 1995. A 2nd Generation Force-Field For The Simulation Of Proteins, Nucleic-Acids, And Organic-Molecules. *J. Am. Chem. Soc.* 117:5179–5197.
- [2] Guntert, P., C. Mumenthaler, and K. Wuthrich, 1997. Torsion Angle Dynamics for NMR Structure Calculation with the New Program DYANA. *J. Mol. Biol.* 273:283–298.
- [3] Guntert, P., 2004. Automated NMR structure calculation with CYANA. *J. Mol. Biol.* 278:353–378.
- [4] Floudas, C. A., 2005. Research Challenges, Opportunities and Synergism in Systems Engineering and Computational Biology. *AIChE J.* 51:1872–1884.
- [5] Ponder, J., 1998. TINKER, Software Tools for Molecular Design. Department of Biochemistry and Molecular Biophysics, Washington University School of Medicine: St. Louis, MO.
- [6] Rohl, C. A., C. E. M. Strauss, K. M. S. Misura, and D. Baker, 2004. Protein Structure Prediction Using Rosetta. *Methods Enzymol.* 383:66–93.
- [7] Lee, M. R., D. Baker, and P. A. Kollman, 2001. 2.1 and 1.8 Å C $\alpha$  RMSD Structure Predictions on Two Small Proteins, HP-36 and S15. *J. Am. Chem. Soc.* 123:1040–1046.
- [8] Rohl, C. A., and D. Baker, 2002. De Novo Determination of Protein Backbone Structure from Residual Dipolar Couplings Using Rosetta. *J. Am. Chem. Soc.* 124:2723–2729.
- [9] DiMaggio, P. A., S. R. McAllister, C. A. Floudas, X. J. Feng, J. D. Rabinowitz, and H. A. Rabitz, 2008. Biclustering via optimal re-ordering of data matrices in systems biology: rigorous methods and comparative studies. *BMC Bioinformatics* 9.
- [10] DiMaggio, P. A., S. R. McAllister, C. A. Floudas, X. J. Feng, J. D. Rabinowitz, and H. A. Rabitz, 2009. Biclustering via Optimal Re-ordering of Data Matrices. *Journal of Global Optimization* in press.
- [11] Gray, J. J., S. Moughon, C. Wang, O. Schueler-Furman, B. Kuhlman, C. A. Rohl, and D. Baker, 2003. Protein-Protein Docking with Simultaneous Optimization of Rigid-body Displacement and Side-chain Conformations. *J. Mol. Biol.* 331:281 – 299.
- [12] Daily, M. D., D. Masica, A. Sivasubramanian, S. Somarouthu, and J. J. Gray, 2005. CAPRI Rounds 3-5 Reveal Promising Successes and Future Challenges for RosettaDock. *Proteins* 60:181–186.
- [13] Gray, J. J., S. E. Moughon, T. Kortemme, O. Schueler-Furman, K. M. S. Misura, A. V. Morozov, and D. Baker, 2003. Protein-Protein Docking Predictions for the CAPRI Experiment. *Proteins* 52:118–122.
- [14] Kuhlman, B., and D. Baker, 2000. Native Protein Sequences Are Close to Optimal for Their Structures. *Proc. Natl. Acad. Sci. USA* 97:10383–10388.
- [15] Dominguez, C., R. Boelens, and A. M. J. J. Bonvin, 2003. HADDOCK: a protein-protein docking approach based on biochemical and/or biophysical information. *J. Am. Chem. Soc.* 125:1731–1737.
- [16] de Vries, S. J., A. D. J. van Dijk, M. Krzeminski, M. van Dijk, A. Thureau, V. Hsu, T. Wassenaar, and A. M. J. J. Bonvin, 2007. HADDOCK versus HADDOCK: New features and performance of HADDOCK2.0 on the CAPRI targets. *Proteins: Struct. Funct. Bioinf.* 69:726–733.
- [17] Janssen, B. J. C., E. F. Halff, J. D. Lambris, and P. Gros, 2007. Structure of Compstatin in Complex with Complement Component C3c Reveals a New Mechanism of Complement Inhibition. *J. Biol. Chem.* 282:29241–29247.
- [18] Klepeis, J. L., C. A. Floudas, D. Morikis, C. G. Tsokos, E. Argyropoulos, L. Spruce, and J. D. Lambris, 2003. Integrated Structural, Computational and Experimental Approach for Lead Optimization: Design of Compstatin Variants with Improved Activity. *J. Am. Chem. Soc.* 125:8422–8423.
- [19] Mallik, B., M. Katragadda, L. Spruce, C. Carafides, C. Tsokos, D. Morikis, and J. Lambris, 2005. Design and NMR Characterization of Active Analogues of Compstatin Containing Non-natural Amino Acids. *J. Med. Chem.* 48:274–286.
- [20] Soulika, A., D. Morikis, M. Sarias, M. Roy, L. Spruce, A. Sahu, and J. Lambris, 2003. Studies of Structure-Activity Relations of Complement Inhibitor Compstatin. *J. Immunology* 171:1881–1890.
- [21] Morikis, D., M. Roy, A. Sahu, A. Torganis, P. Jennings, G. Tsokos, and J. Lambris, 2002. The structural basis of compstatin activity examined by structure-function-based design of peptide analogs and NMR. *J. Biol. Chem.* 277:14942–14953.
- [22] Morikis, D., and J. Lambris, 2002. Structural aspects and design of low molecular mass complement inhibitors. *Biochem. Soc. Trans.* 30:1026–1036.
- [23] Sahu, A., B. Kay, and J. Lambris, 1996. Inhibition of human complement by a C3-binding peptide isolated from a phage displayed random peptide library. *J. Immunol.* 157:884–891.
- [24] Koradi, R., M. Billeter, and K. Wuthrich, 1996. MOLMOL: A program for display and analysis of

macromolecular structures. *J. Mol. Graphics* 14:51– 55.

[25] Guex, N., and M. C. Peitsch, 1997. SWISS-MODEL and the Swiss- PdbViewer: an environment for comparative protein modeling. *Electrophoresis* 18:2714–2723.
